# Supplementary material for: 3D-GloBFP: the first global three-dimensional building footprint dataset
Source: Copernicus journal article supplement (doi:10.5194/essd-16-5357-2024), 2024-11-25
Supplement: Supplementary file 1 [file essd-16-5357-2024-supplement.pdf]

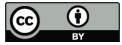

*Supplement of*

## **3D-GloBFP: the first global three-dimensional building footprint dataset**

**Yangzi Che et al.**

*Correspondence to:* Xiaoping Liu (liuxp3@mail.sysu.edu.cn)

The copyright of individual parts of the supplement might differ from the article licence.

**Table S1. Features with multiple sources used in building height estimation model**

| Category                      | Datasets                              | Feature name                                                                                                                                                                                                                   | Resolution | Provider                                                                             | Link                                                                                                                                                      |
|-------------------------------|---------------------------------------|--------------------------------------------------------------------------------------------------------------------------------------------------------------------------------------------------------------------------------|------------|--------------------------------------------------------------------------------------|-----------------------------------------------------------------------------------------------------------------------------------------------------------|
| Synthetic aperture radar data | Sentinel-1                            | VV_mean, VV_std, VV_p5, VV_p25, VV_p50, VV_p75, VH_p95, VH_mean, VH_std, VH_p5, VH_p25, VH_p50, VH_p75, VH_p95                                                                                                                 | 10m        | European Union/ESA/Copernicus                                                        | <a href="https://earth.esa.int/">https://earth.esa.int/</a>                                                                                               |
|                               | PALSAR                                | HH_mean, HH_std, HH_p5, HH_p25, HH_p50, HH_p75, HH_p95, HV_mean, HV_std, HV_p5, HV_p25, HV_p50, HV_p75, HV_p95                                                                                                                 | 25m        | JAXA EORC                                                                            | <a href="https://www.eorc.jaxa.jp/ALOS/">https://www.eorc.jaxa.jp/ALOS/</a>                                                                               |
| Optical data                  | Sentinel-2                            | B2_mean, B2_std, B2_p5, B2_p25, B2_p50, B2_p75, B2_p95, B3_mean, B3_std, B3_p5, B3_p25, B3_p50, B3_p75, B3_p95, B4_mean, B4_std, B4_p5, B4_p25, B4_p50, B4_p75, B4_p95, B8_mean, B8_std, B8_p5, B8_p25, B8_p50, B8_p75, B8_p95 | 10m        | European Union/ESA/Copernicus                                                        | <a href="https://earth.esa.int/">https://earth.esa.int/</a>                                                                                               |
|                               | Nighttime light                       | LightRad_mean, LightRad_std, LightRad_p5, LightRad_p25, LightRad_p50, LightRad_p75, LightRad_p95                                                                                                                               | 463.83m    | Earth Observation Group, Payne Institute for Public Policy, Colorado School of Mines | <a href="https://payneinstitute.mines.edu/">https://payneinstitute.mines.edu/</a>                                                                         |
| Terrian data                  | DEM                                   | DEM_mean, DEM_std, DEM_p5, DEM_p25, DEM_p50, DEM_p75, DEM_p95                                                                                                                                                                  | 30m        | NASA/USGS/JPL-Caltech                                                                | <a href="https://cmr.earthdata.nasa.gov/">https://cmr.earthdata.nasa.gov/</a>                                                                             |
|                               | DSM                                   | DSM_mean, DSM_std, DSM_p5, DSM_p25, DSM_p50, DSM_p75, DSM_p95                                                                                                                                                                  | 30m        | JAXA Earth Observation Research Center                                               | <a href="https://www.eorc.jaxa.jp/ALOS/">https://www.eorc.jaxa.jp/ALOS/</a>                                                                               |
|                               | nDSM                                  | nDSM_mean, nDSM_std, nDSM_p5, nDSM_p25, nDSM_p50, nDSM_p75, nDSM_p95                                                                                                                                                           | 30m        | /                                                                                    | /                                                                                                                                                         |
| Population data               | World Population                      | pop_mean, pop_std, pop_p5, pop_p25, pop_p50, pop_p75, pop_p95                                                                                                                                                                  | 92.77m     | WorldPop                                                                             | <a href="https://www.worldpop.org/">https://www.worldpop.org/</a>                                                                                         |
| Vector-derived data           | Area of individual building           | Area                                                                                                                                                                                                                           | /          | Microsoft                                                                            | <a href="https://wiki.openstreetmap.org/wiki/Microsoft_Building_Footprint_Data">https://wiki.openstreetmap.org/wiki/Microsoft_Building_Footprint_Data</a> |
|                               | Perimeter of individual building      | Perimeter                                                                                                                                                                                                                      | /          |                                                                                      |                                                                                                                                                           |
|                               | Compactness of individual building    | Compactness                                                                                                                                                                                                                    | /          |                                                                                      |                                                                                                                                                           |
|                               | Fractality of individual building     | Fractality                                                                                                                                                                                                                     | /          |                                                                                      |                                                                                                                                                           |
|                               | Cooke JC index of individual building | Cooke JC index                                                                                                                                                                                                                 | /          |                                                                                      |                                                                                                                                                           |

\*ndsm is calculated by DSM-DEM

**Table S2. Reference datasets collected from GIS government portals.**

| <b>City</b>                                                                                                                | <b>Country of affiliation</b> | <b>Source</b>                                                                             |
|----------------------------------------------------------------------------------------------------------------------------|-------------------------------|-------------------------------------------------------------------------------------------|
| Beijing, Shanghai, Guangzhou, Chongqing                                                                                    | China                         | <a href="https://map.baidu.com/">https://map.baidu.com/</a>                               |
| Houston, New York, Jacksonville, Philadelphia, San Francisco, Seattle, Denver, Newport News, Louisville, Portland, Boulder | The United States             | <a href="https://www.arcgis.com/home">https://www.arcgis.com/home</a>                     |
| Saint Paul                                                                                                                 | Brazil                        | <a href="https://geosampa.prefeitura.sp.gov.br">https://geosampa.prefeitura.sp.gov.br</a> |
| London                                                                                                                     | England                       | <a href="https://www.emu-analytics.com/">https://www.emu-analytics.com/</a>               |
| Melbourne                                                                                                                  | Australia                     | <a href="https://data.melbourne.vic.gov.au">https://data.melbourne.vic.gov.au</a>         |
| Vancouver                                                                                                                  | Canada                        | <a href="https://opendata.vancouver.ca">https://opendata.vancouver.ca</a>                 |

**Table S3. Building height datasets for comparison in global and individual regions.**

| <b>Height dataset</b>                                                                    | <b>Spatial resolution</b> | <b>Validation region</b> |
|------------------------------------------------------------------------------------------|---------------------------|--------------------------|
| World Settlement Footprint (WSF)<br><i>(Esch et al., 2022)</i>                           | 90m                       | Global/Europe            |
| Global Human Settlement Layer-Built-up height (GHSL-H)<br><i>(Pesaresi et al., 2021)</i> | 100m                      | Global/Europe            |
| Height in <i>Li et al. (2022)</i>                                                        | 1km                       | Global/Europe            |
| Height in <i>Zhou et al. (2022)</i>                                                      | 500m                      | Global/Europe            |
| Height in <i>Arehart et al. (2021)</i>                                                   | Building-scale            | The United States        |
| Microsoft building height<br><i>(Microsoft, 2020)</i>                                    | Building-scale            | The United States        |
| Chinese Building Height (CNBH)<br><i>(Wu et al., 2023)</i>                               | 10m                       | China                    |
| Height in <i>Huang et al. (2022)</i>                                                     | 30m                       | China                    |

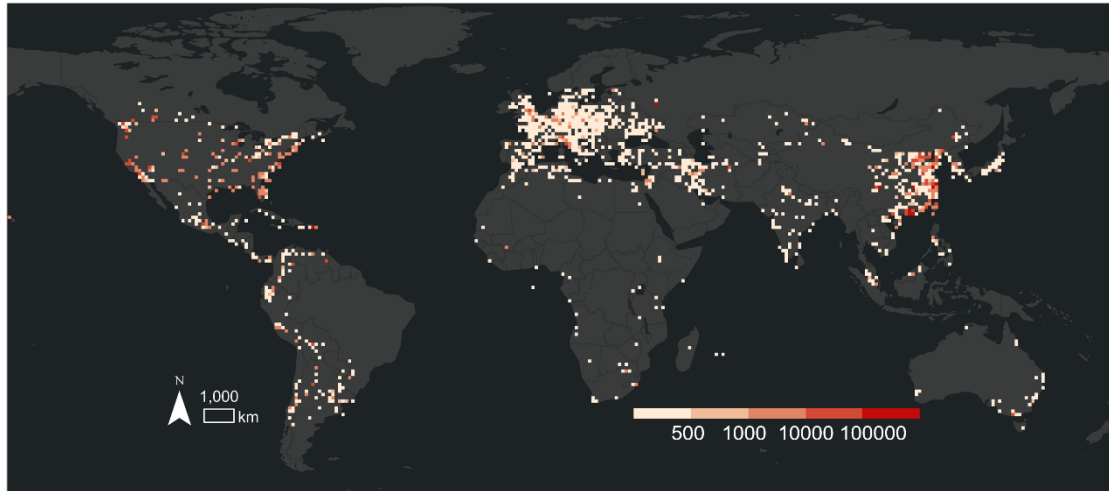

**Figure S1. Building with height properties at  $0.1^\circ \times 0.1^\circ$  scale.**

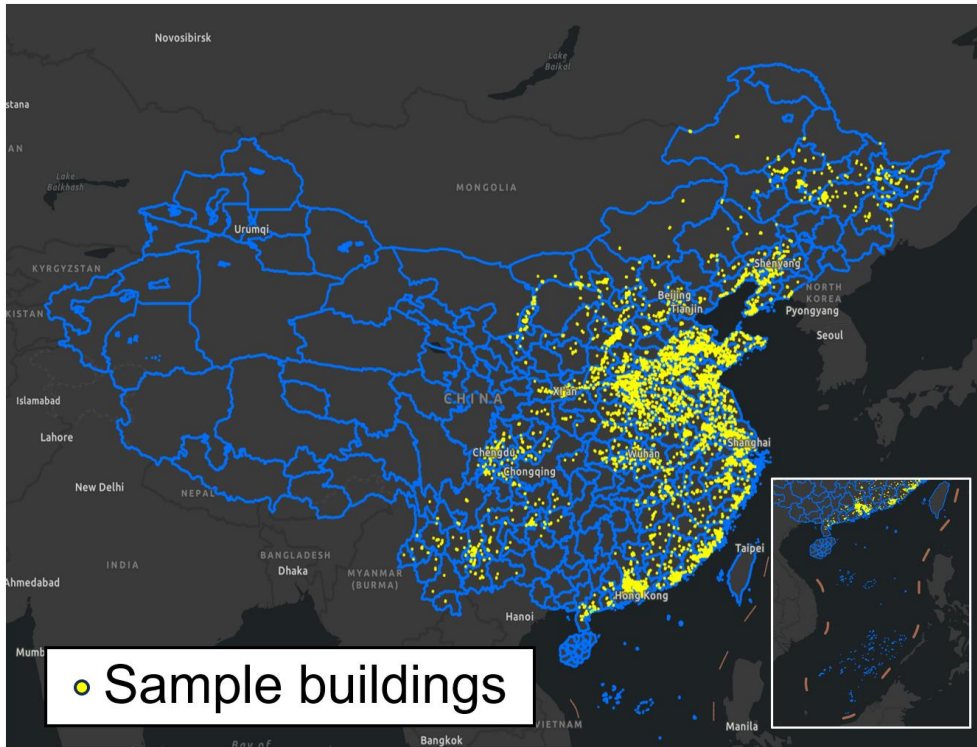

**Figure S2. Samples of building height in China.**

## **Reference**

- Arehart, J., Pomponi, F., D'Amico, B., and Srubar Iii, W.: A new estimate of building floor space in North America, *Environmental Science & Technology*, 55, 10.1021/acs.est.0c05081, 2021.
- Esch, T., Brzoska, E., Dech, S., Leutner, B., Palacios-Lopez, D., Metz-Marconcini, A., Marconcini, M., Roth, A., and Zeidler, J.: World Settlement Footprint 3D - A first three-dimensional survey of the global building stock, *Remote Sensing of Environment*, 270, 112877-112877, <https://doi.org/10.1016/j.rse.2021.112877>, 2022.
- Huang, H., Chen, P., Xu, X., Liu, C., Wang, J., Liu, C., Clinton, N., and Gong, P.: Estimating building height in China from ALOS AW3D30, *ISPRS Journal of Photogrammetry and Remote Sensing*, 185, 146-157, <https://doi.org/10.1016/j.isprsjprs.2022.01.022>, 2022.
- Li, M., Wang, Y., Rosier, J. F., Verburg, P. H., and van Vliet, J.: Global maps of 3D built-up patterns for urban morphological analysis, *International Journal of Applied Earth Observation and Geoinformation*, 114, 103048, <https://doi.org/10.1016/j.jag.2022.103048>, 2022.
- Microsoft: Worldwide building footprints derived from satellite imagery, 2020.
- Pesaresi, M., Corbane, C., Ren, C., and Edward, N.: Generalized Vertical Components of built-up areas from global Digital Elevation Models by multi-scale linear regression modelling, *PLOS ONE*, 16, e0244478, 10.1371/journal.pone.0244478, 2021.
- Wu, W.-B., Ma, J., Banzhaf, E., Meadows, M. E., Yu, Z.-W., Guo, F.-X., Sengupta, D., Cai, X.-X., and Zhao, B.: A first Chinese building height estimate at 10 m resolution (CNBH-10 m) using multi-source earth observations and machine learning, *Remote Sensing of Environment*, 291, 113578, <https://doi.org/10.1016/j.rse.2023.113578>, 2023.
- Zhou, Y., Li, X., Chen, W., Meng, L., Wu, Q., Gong, P., and Seto, K. C.: Satellite mapping of urban built-up heights reveals extreme infrastructure gaps and inequalities in the Global South, *Proceedings of the National Academy of Sciences*, 119, e2214813119, doi:10.1073/pnas.2214813119, 2022.
